# Supplementary material for: Maternal Wnt11b regulates cortical rotation during Xenopus axis formation: analysis of maternal-effect wnt11b mutants
Source: Oxford University Press journal article supplement (doi:10.1242/dev.200552), 2022-08-10
Supplement: dev200552supp.pdf [file dev200552supp.pdf]

## Supplementary Materials and Methods

### Immunostaining

Whole-mount immunostaining on embryos was performed by fixing in MEMFA or 100% methanol (for anti-tubulin and anti-cytokeratin mAbs), followed by storage in methanol. Samples were rehydrated gradually to 1x PBS, then to PBT(PBS/0.5% Triton X-100/0.2% BSA (fraction V)) and then blocked for two hours at room temperature in PBT/2.5% BSA. Primary antibodies (1:5) or Alexa-488 phalloidin (1:500) were diluted in the blocking solution and incubation was carried out overnight at 4°C. After extensive washing (5 x one hour in PBT), peroxidase- or Alexa-488 conjugated secondary antibodies (1:500; peroxidase goat anti-mouse IgG; Jackson ImmunoResearch; or Alexa-488 goat anti-mouse IgG, ThermoFisher) were added where appropriate and incubated overnight at 4°C. Following washes as above, samples with peroxide secondaries were first washed in PBS lacking detergent, and then incubated in either FITC- or Rhodamine-tyramide diluted 1:100 in a stable peroxide buffer (ThermoFisherPierce). Tyramides were synthesised according to a Xenbase.org wiki protocol and (Hopman et al., 1998). The tyramide detection reaction was carried out for 30 minutes and samples were extensively washed in PBT, including an overnight wash at 4°C.

For two-colour detection, the initial peroxidase was inactivated by incubation in 2% H<sub>2</sub>O<sub>2</sub> in PBS (30 minutes), followed by washing, blocking and antibody incubation as above (peroxidase goat anti-mouse IgM was used for Tor70 detection). Tyramide detection was again performed using the second colour. For final imaging, samples were gradually transitioned to ~50% TDE (2,2'-thiodiethanol)/PBS and visualised using epifluorescence microscopy.

Primary antibodies were 1:5 dilutions of monoclonal antibody supernatants (DSHB Hybridoma Product 1h5, deposited with the DSHB by M. Klymkowsky; (Klymkowsky et al., 1987), RRID:AB\_528323; DSHB Hybridoma Product 12/101, deposited with the DSHB by J.P. Brockes; (Kintner and Brockes, 1984), RRID:AB\_531892; DSHB Hybridoma Product tor70/Notochord Ab1, deposited with the DSHB by R.M. Harland; (Bolce et al., 1992), RRID:AB\_2722485; and DSHB Hybridoma Product XAN-3 (Clone 6F11), deposited with the DSHB by D.S. Sakaguchi; (Lamb et al., 1993)) and 1:200 dilution of concentrated anti-Beta-tubulin mAb E7 (1:200 dilution of monoclonal antibody concentrate; DSHB Hybridoma Product E7, deposited with the DSHB by M. Klymkowsky; (Chu and Klymkowsky, 1989); RRID:AB\_528499).

### Supplemental References

**Bolce, M. E., Hemmati-Brivanlou, A., Kushner, P. D. and Harland, R. M.** (1992). Ventral ectoderm of *Xenopus* forms neural tissue, including hindbrain, in response to activin. *Development* 115, 681–8.

**Chu, D. T. and Klymkowsky, M. W.** (1989). The appearance of acetylated alpha-tubulin during early development and cellular differentiation in *Xenopus*. *Developmental Biology* 136, 104–117.

**Hopman, A. H. N., Ramaekers, F. C. S. and Speel, E. J. M.** (1998). Rapid Synthesis of Biotin-, Digoxigenin-, Trinitrophenyl-, and Fluorochrome-labeled Tyramides and Their Application for In Situ Hybridization Using CARD Amplification. *J Histochem Cytochem* 46, 771–777.

**Kintner, C. R. and Brockes, J. P.** (1984). Monoclonal antibodies identify blastemal cells derived from dedifferentiating limb regeneration. *Nature* 308, 67–9.

**Klymkowsky, M. W., Maynell, L. A. and Polson, A. G.** (1987). Polar asymmetry in the organization of the cortical cytokeratin system of *Xenopus laevis* oocytes and embryos. *Development* 100, 543–557.

**Lamb, T. M., Knecht, A. K., Smith, W. C., Stachel, S. E., Economides, A. N., Stahl, N., Yancopolous, G. D. and Harland, R. M.** (1993). Neural Induction by the Secreted Polypeptide Noggin. *Science* 262, 713–718.

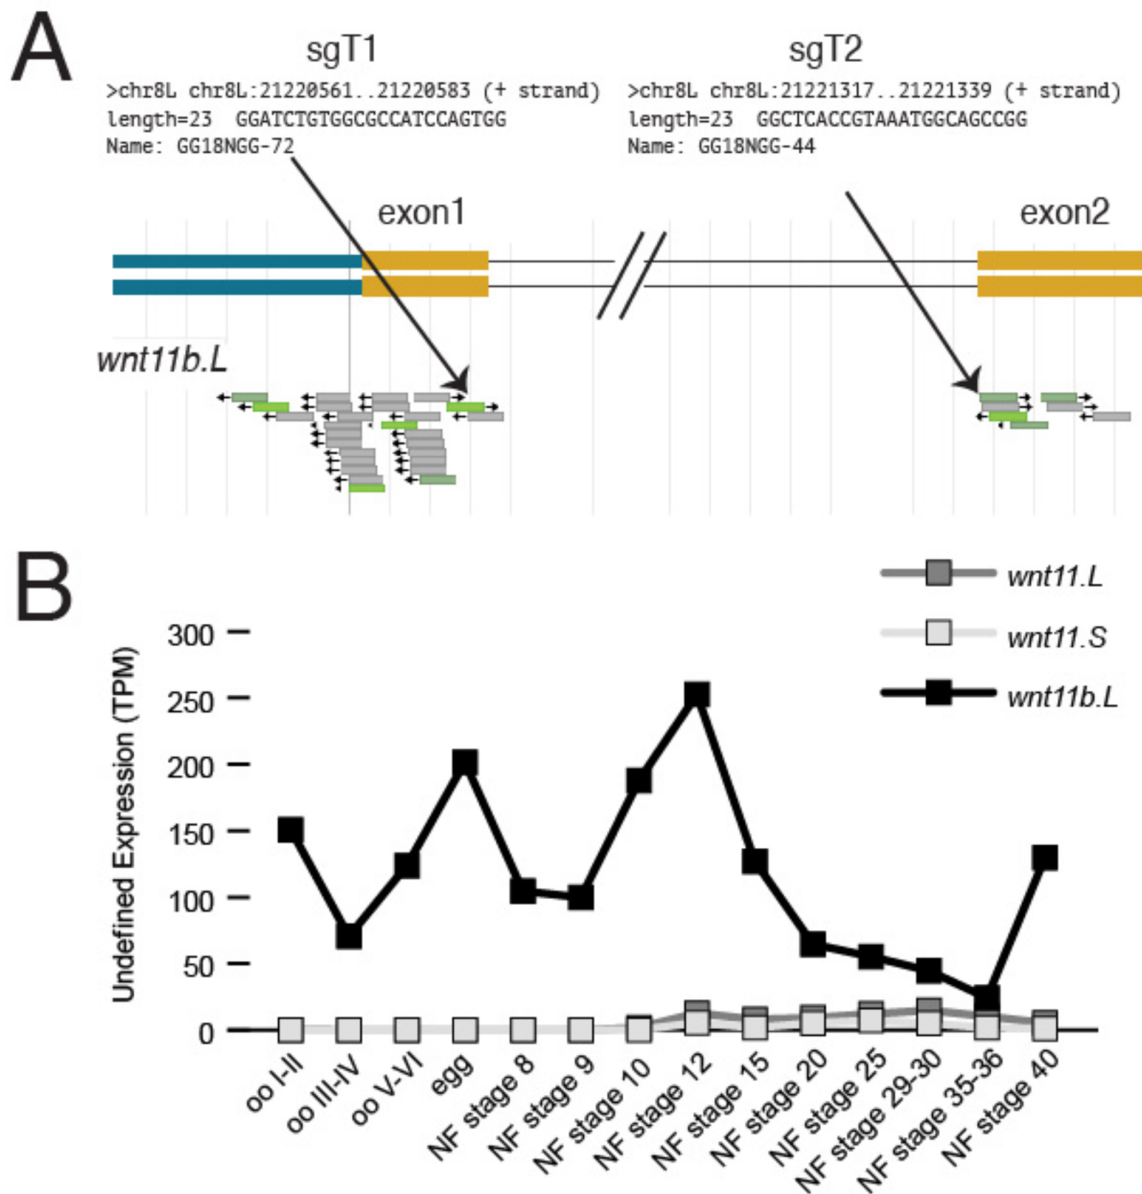

**Fig. S1.** (A) Location and sequence information for sgRNAs against *wnt11b.L*. Genome browser view was obtained from Xenbase. (B) Expression of *wnt11b.L*, *wnt11.L* and *wnt11.S* during oogenesis and development. RNAseq expression data from Session et al. (2016) retrieved from Xenbase TPM=transcripts per million; oo=oocyte stage; NF= Nieuwkoop and Faber (1956) stage.

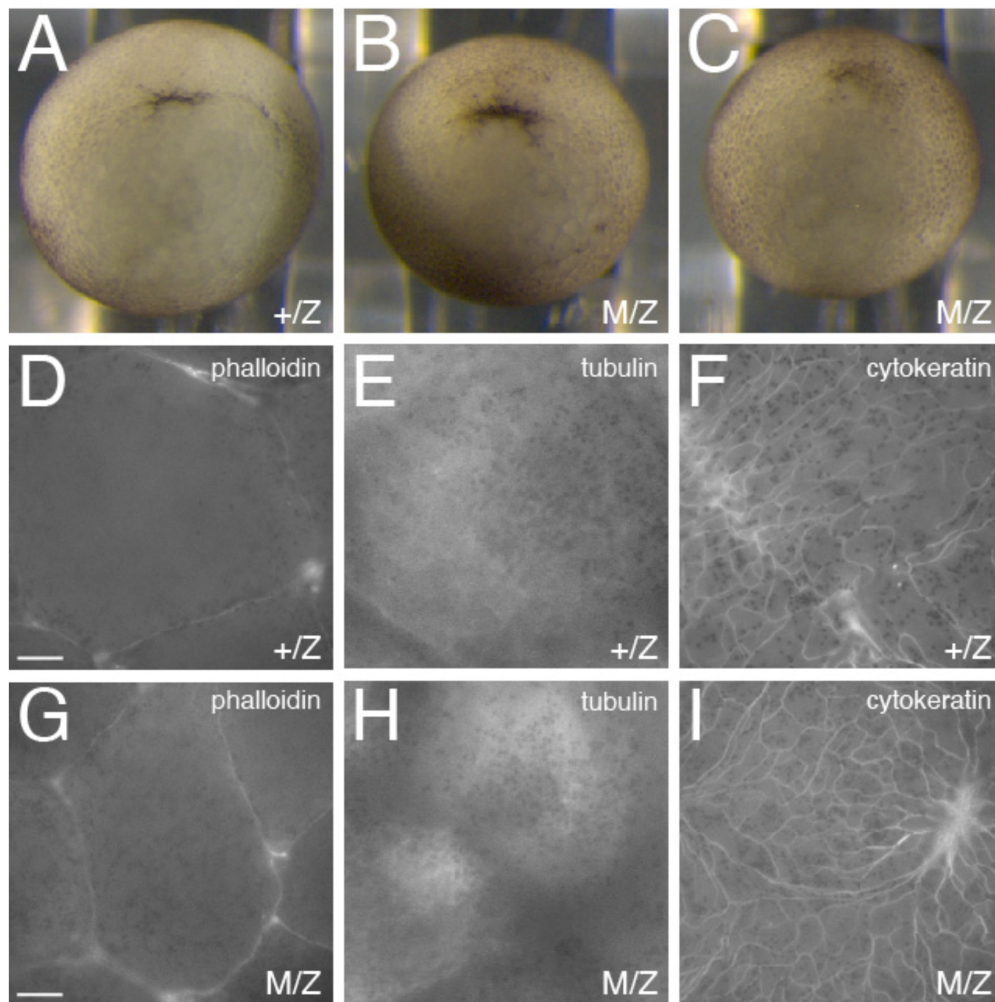

**Fig. S2.** (A-C) Examples of an +*Zwnt11b*+/- embryo (A) and *MZwnt11b*-/- embryos (B-C) at the onset of gastrulation (NF stage 10-10 1/4), showing variation in timing of dorsal lip formation. (D-I) Immunostaining of against F-actin, beta- tubulin and cytokeratin in heterozygous +/Z (D-F) or *wnt11b* mutant (G-I) gastrulae (stage 10). Equatorial images are shown (63x mag.), scale bars are 10  $\mu$ m.

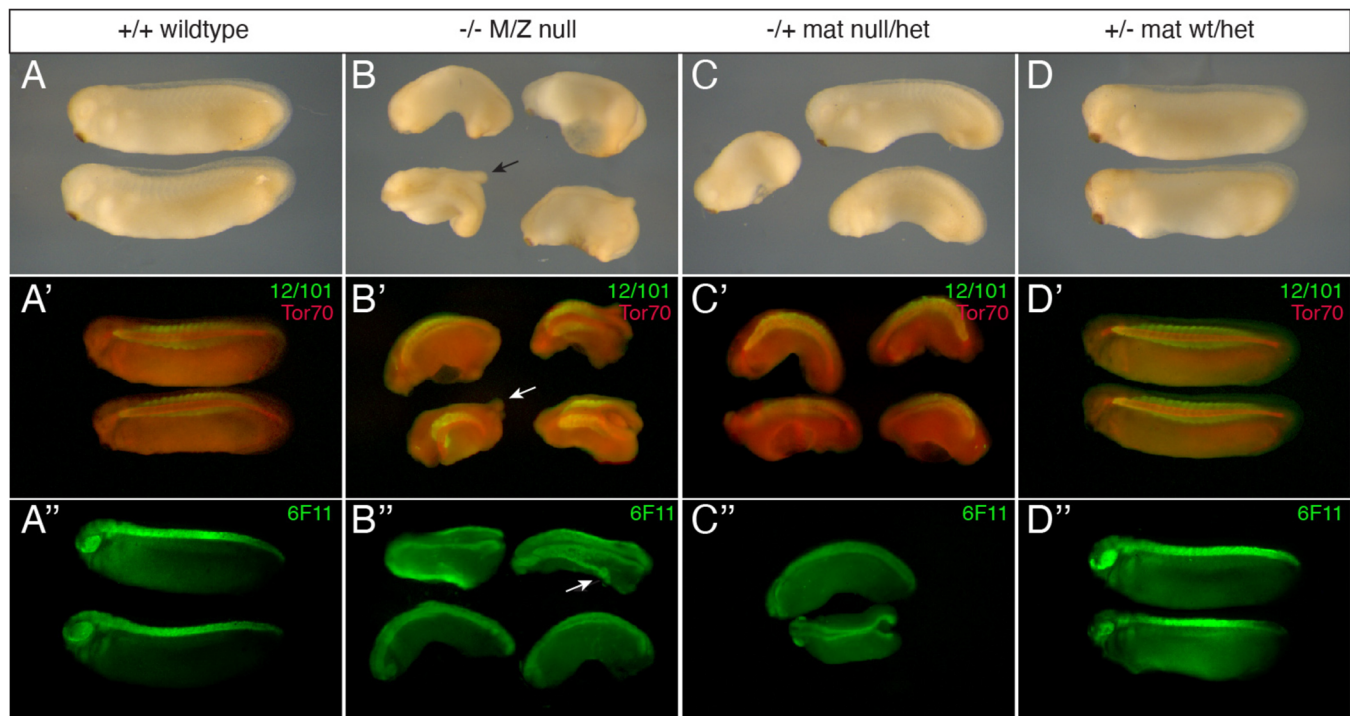

**Fig. S3.** (A-D) Phenotypes of control (A, D) and maternal-effect *wnt11b* mutant embryos (B, C). (A'-D') Double immunostaining against somite (12/101; green) and notochord (Tor70; red) antigens. (A''-D'') Immunostaining against a neural-specific antigen (6F11 (NCAM); green). Arrows indicate ectopic tailbud-like structures.

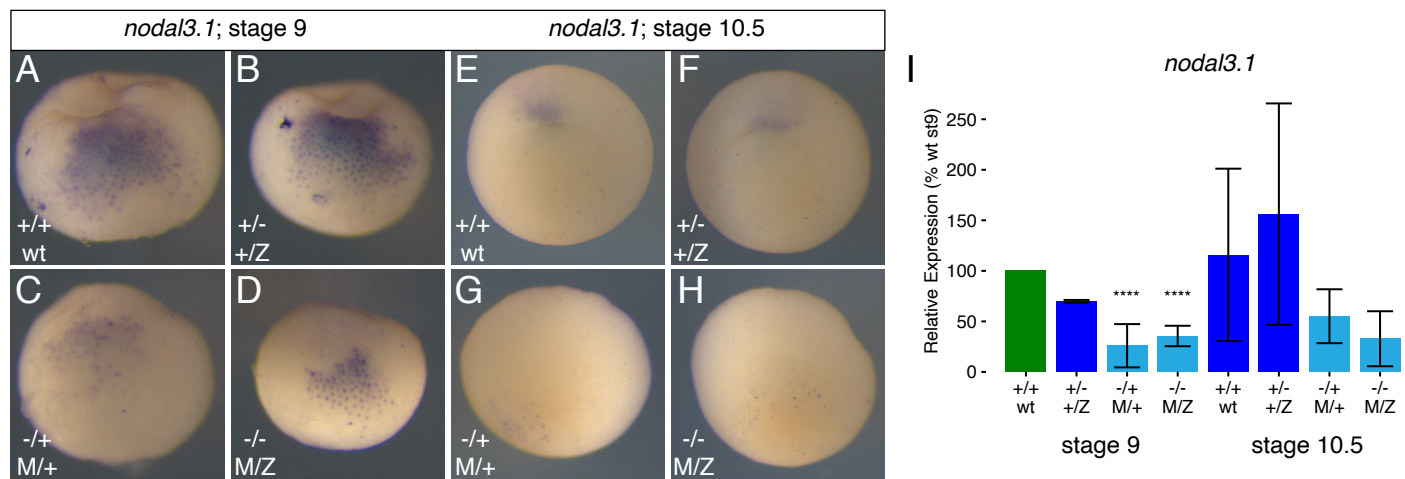

**Fig. S4.** (A-H) In situ hybridization against *nodal3.1* in maternally wildtype (wt) (A-B, E-F) and mutant *wnt11b* embryos (C-D, G-H) at stage 9 (A-D; dorsal views) and stage 10.5 (E-H; vegetal views, dorsal to top). (I) Real-time RT-PCR analysis of *nodal3.1* at stage 9 and 10.5. The bar in green indicates the sample used for normalization of relative expression. Error bars represent standard deviation of two biological replicates. \*\*\*\* p < 0.0001 versus wildtype within stage group.

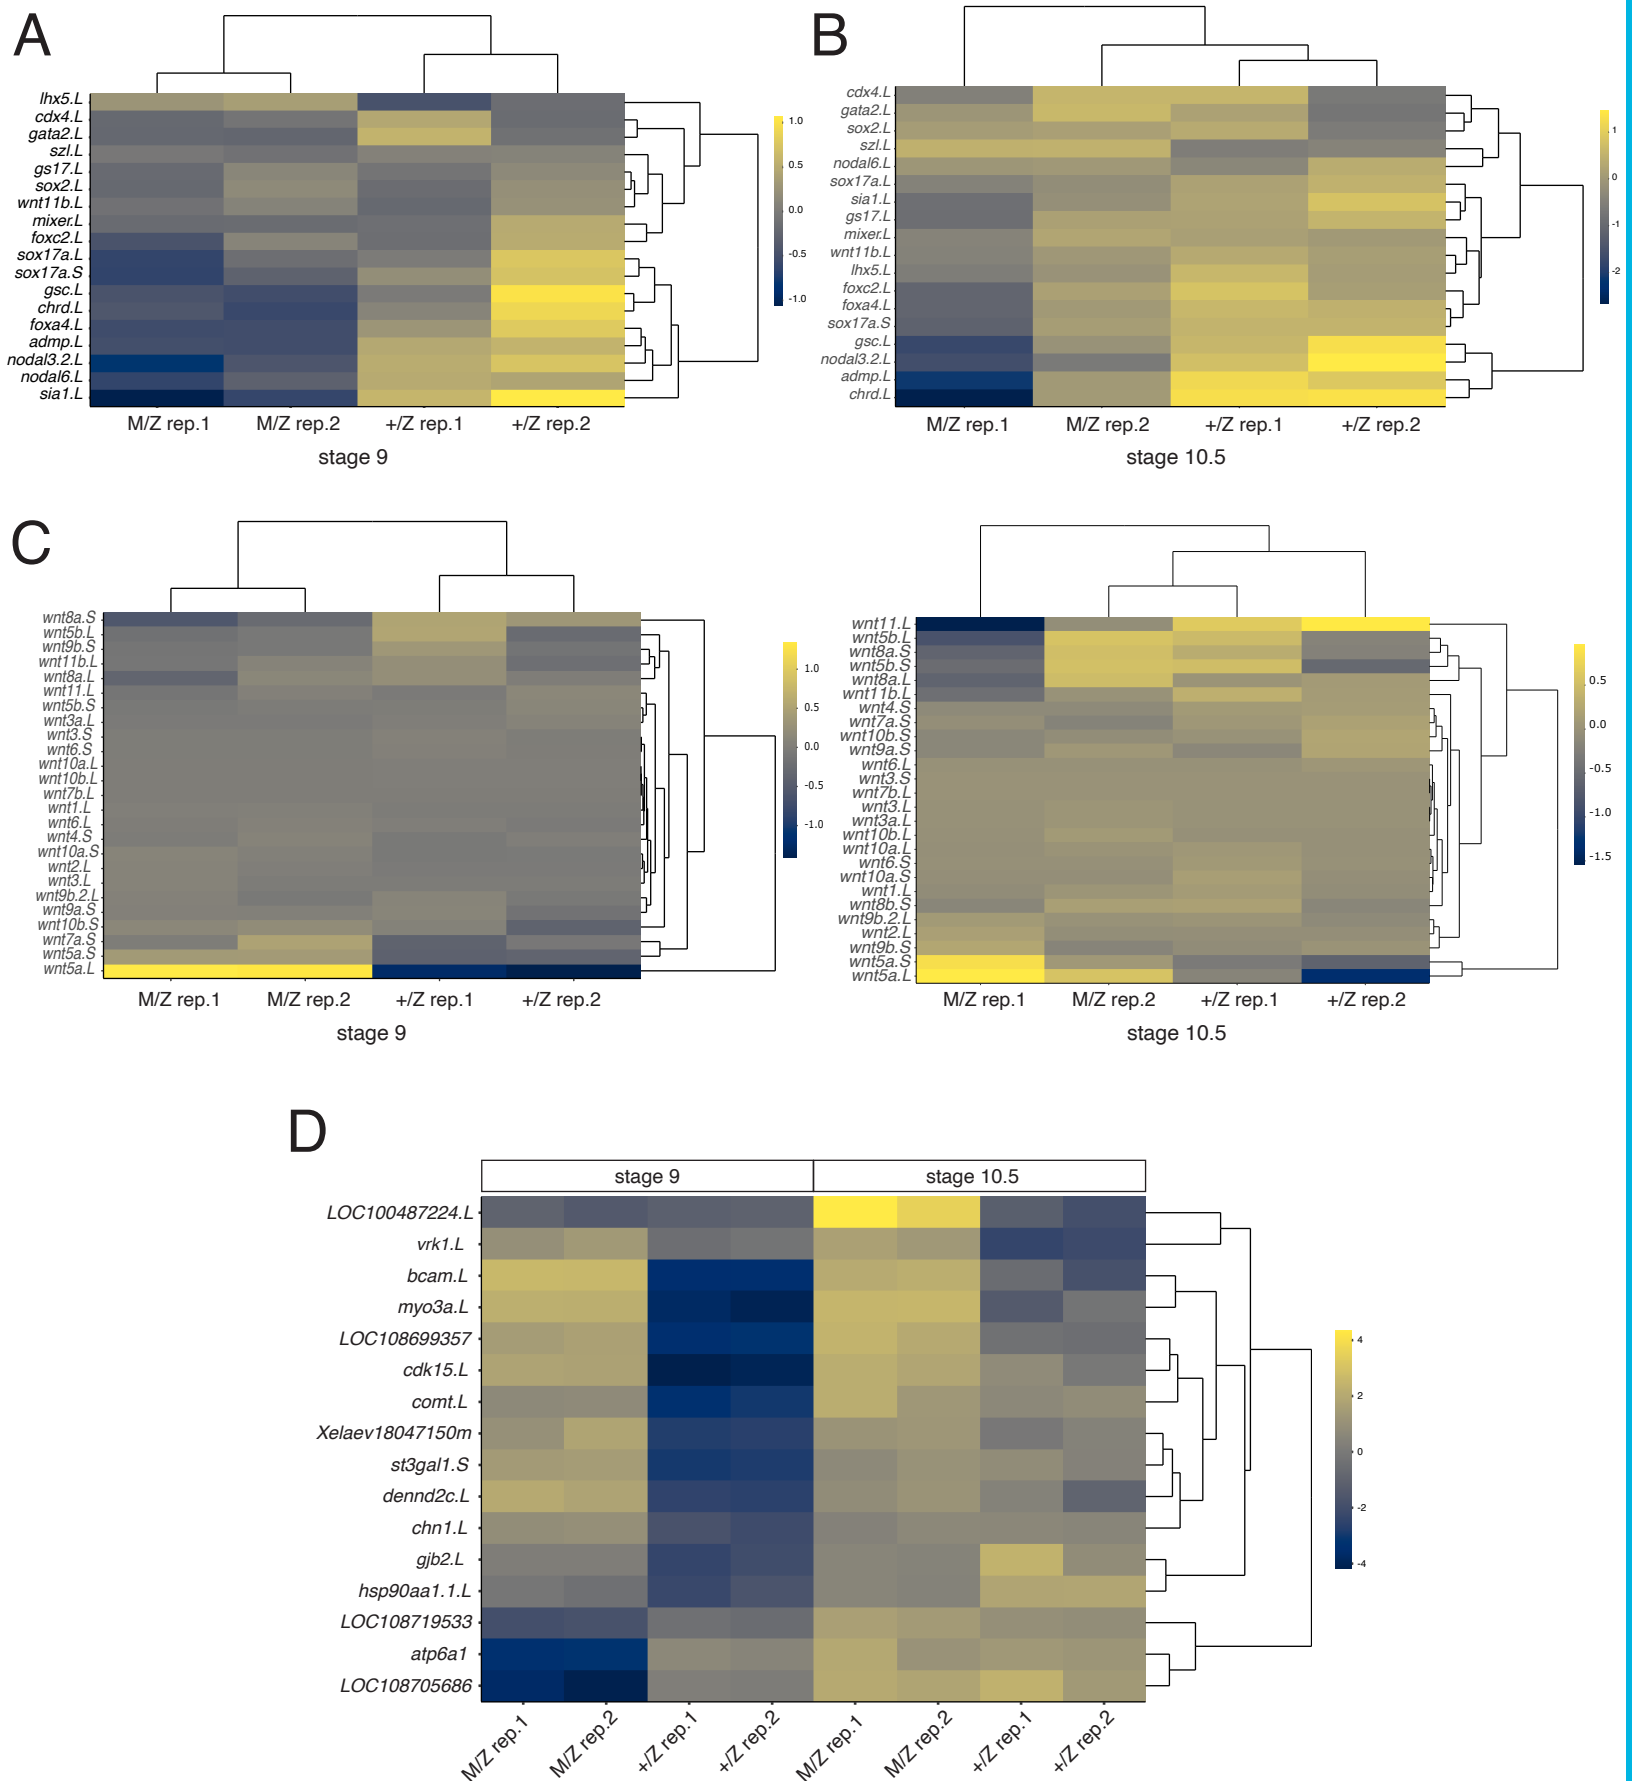

**Fig. S5.** Heatmaps showing relative gene expression changes for selected germ layer and patterning markers at stage 9 (A) and stage 10.5 (B), stage 9 and 10.5 wnt genes (C) and top 16 differentially expressed genes across both stages (D). Values for each gene represent the differences from the mean value all samples, following regularized log<sub>2</sub> transformation of counts. Replicates are biological replicates of three pooled embryos per replicate sample. Darker colors indicate relative downregulation; lighter colors indicate relative upregulation.

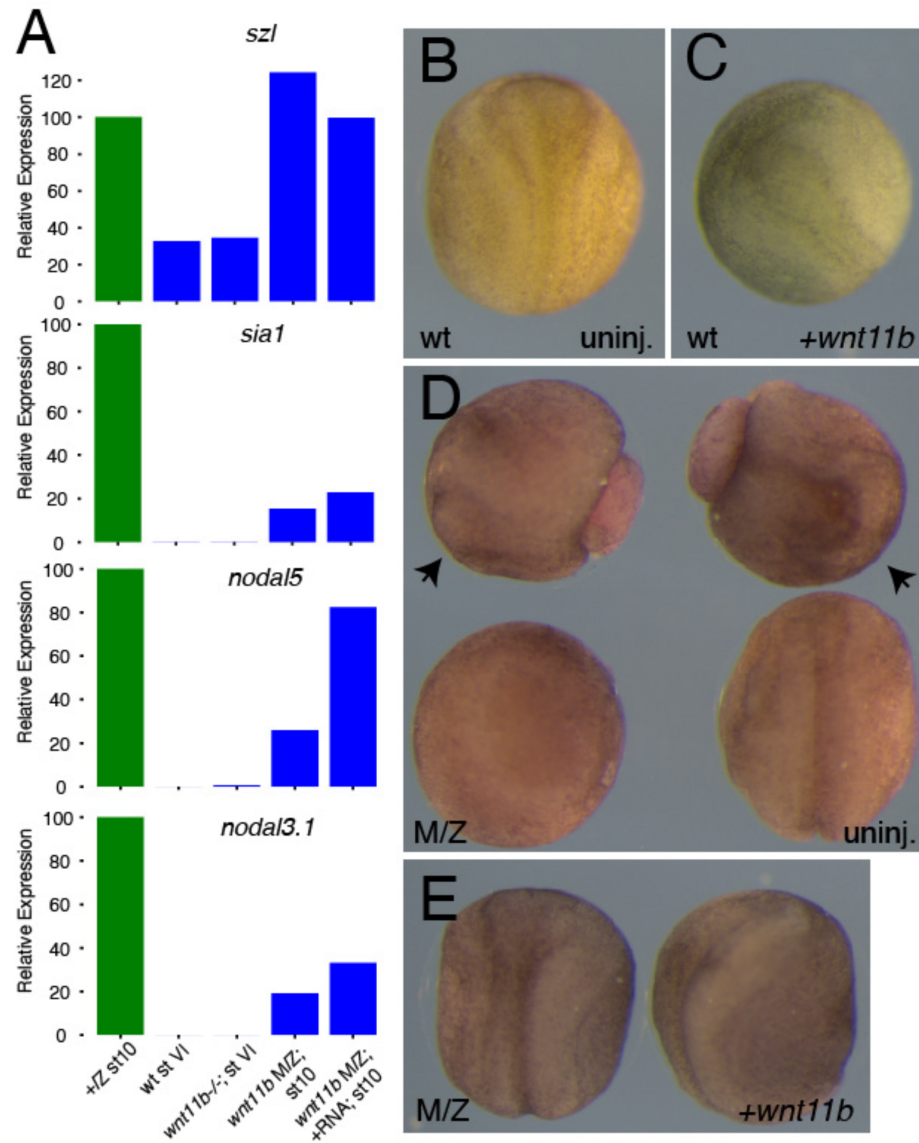

**Fig. S6.** (A) Real-time RT-PCR analysis of ventral (*sz* and dorsal (*sia1*, *noda/5*, *noda/3.1*) in stage 10 embryos derived from wild type (wt) or *wnt11b* mutant (M/Z) oocytes fertilized by wild type sperm following host-transfer (three pooled oocytes/embryos per sample). Control heterozygous (+/Z) embryos were used for normalization of relative expression (green bar). (B-E) Representative phenotypes of control (+/Z; B, C) and *wnt11b* mutant (D, E) embryos obtained by host-transfer. Samples in B and D were left uninjected (uninj.); samples in (C) and (E) were injected as oocytes with 20 pg *wnt11b* mRNA. Dorsal views, anterior is up except top row in (D), where arrowheads indicate anterior.



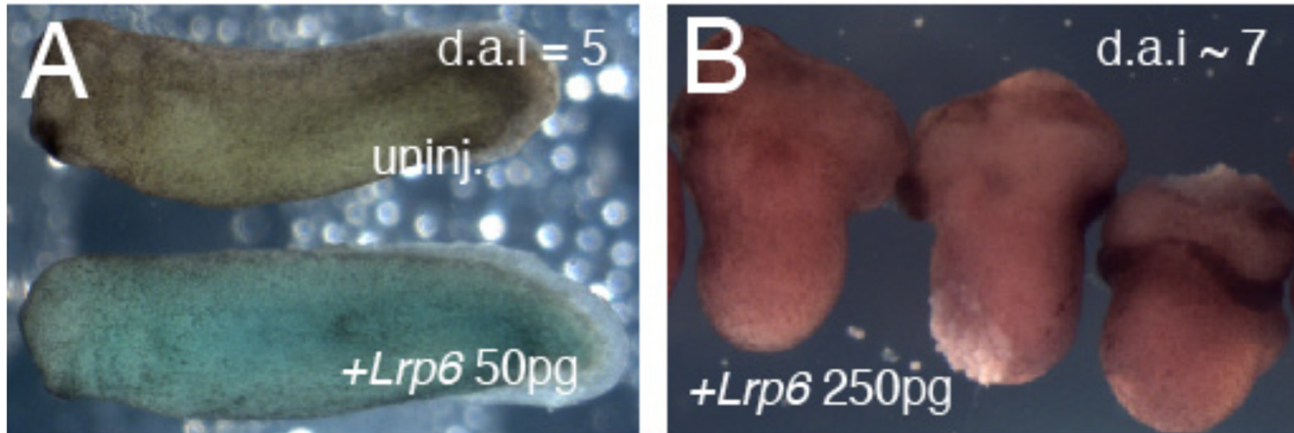

**Fig. S7.** (A) Representative phenotypes of embryos derived from host-transferred oocytes left uninjected (uninj.) or injected with low (A, 50 pg) or high doses (B, 250 pg) of mouse *Lrp6* mRNA. d.a.i, dorsoanterior index (Kao and Elinson, 1988) of the examples shown.

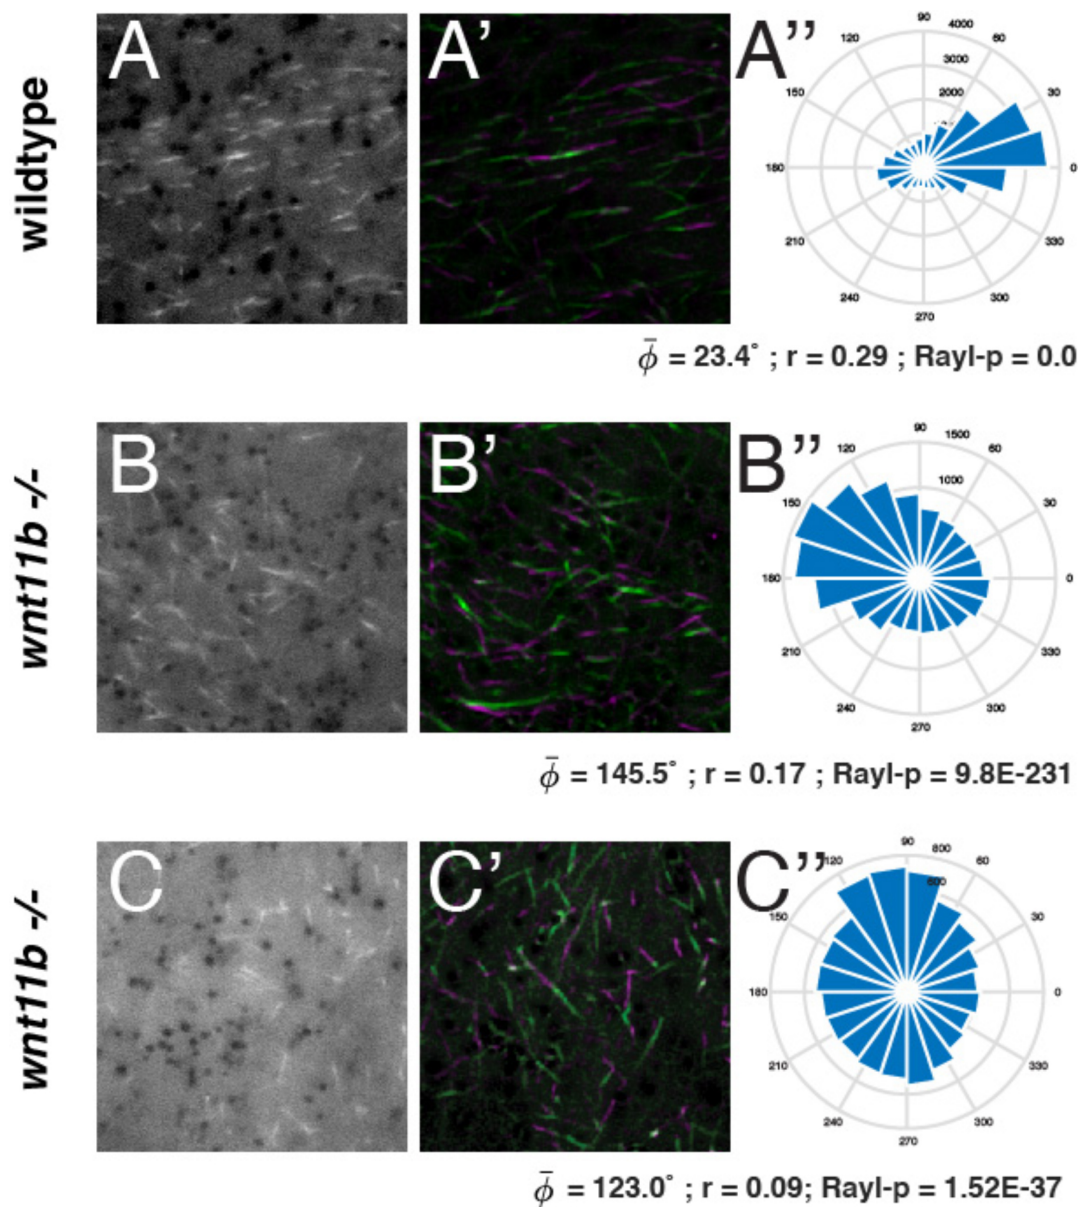

**Fig. S8. Additional microtubule tracking examples.** (A-C) Representative single frames from time-lapse movies of prick-activated control (A) or *wnt11b-l-* mutant oocytes (B,C) injected with *eb3-gfp* mRNA. (A'-C') Microtubule motion is depicted by averaging frames 1-5 and frames 7-11 and merging pseudo-colored images green and magenta, respectively. (C-C'') Angle histogram plots showing individual plus end track directionality (degree) per bin per two minute movie. An example of a *wnt11b-l-* mutant sample with lower directionality ( $r < 0.1$ ) is shown in C-C''. Circular statistics are listed; cp ( $\bar{\phi}$ ) = mean angle,  $r$  = mean resultant vector length, Rayl-p = p-value of Rayleigh test for circular uniformity.

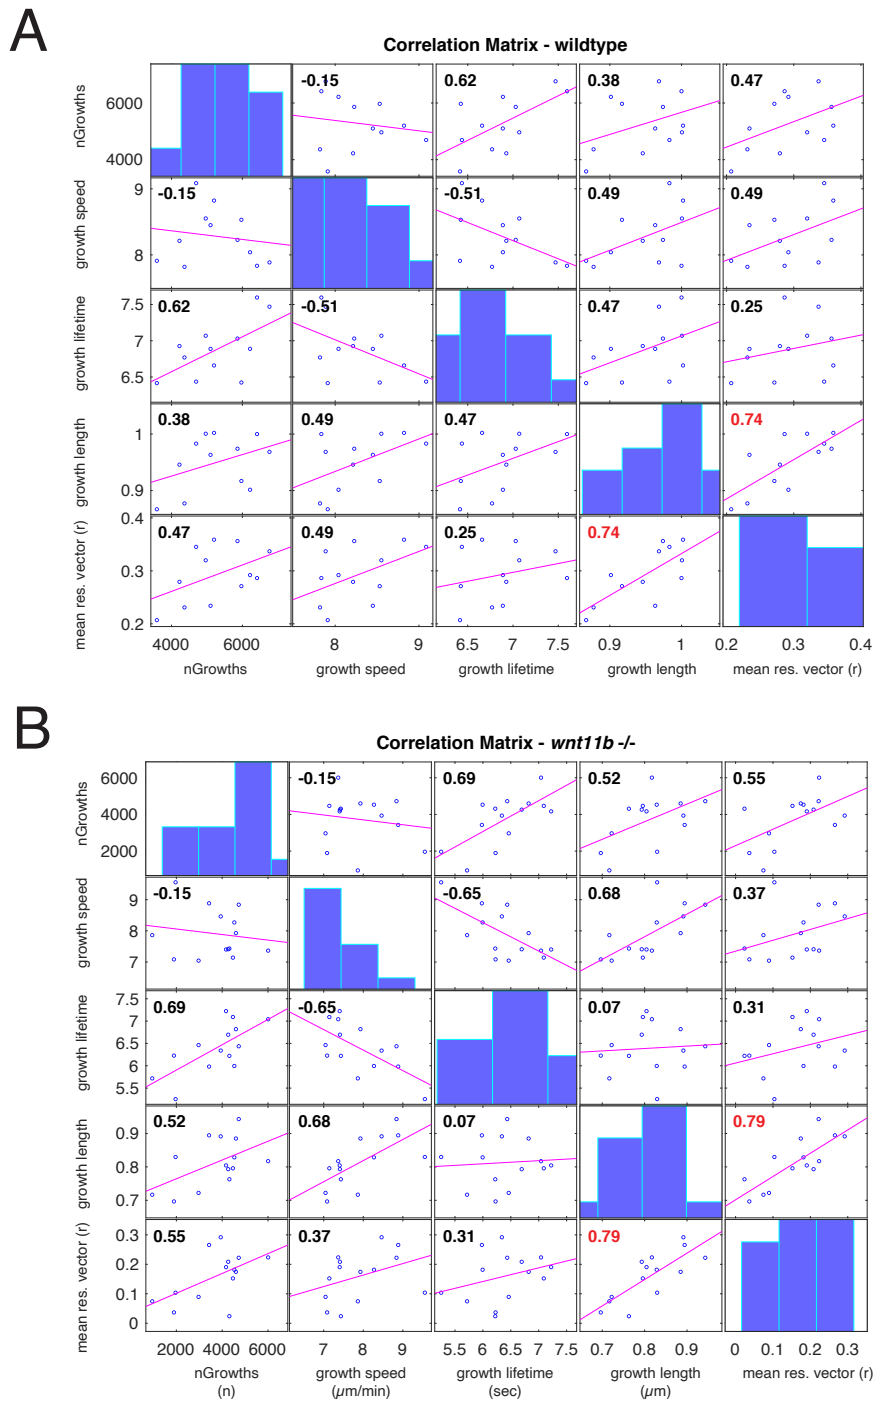

**Fig. S9.** Correlation matrices and histograms (diagonals) of microtubule dynamic parameters in time-lapse movies from wildtype (A) and mutant (B), prick-activated eggs imaged at 60 minutes post-fertilization. Magenta lines show the least squares fit line, correlation values are upper left (red colour indicates statistical significance;  $P < 0.05$ ). Please note the differing scales between the two matrix plots and the scales in Fig. 7G; the bottom row of each panel is identical to the corresponding panels in Fig. 7G (except for scale and aesthetic adjustments).

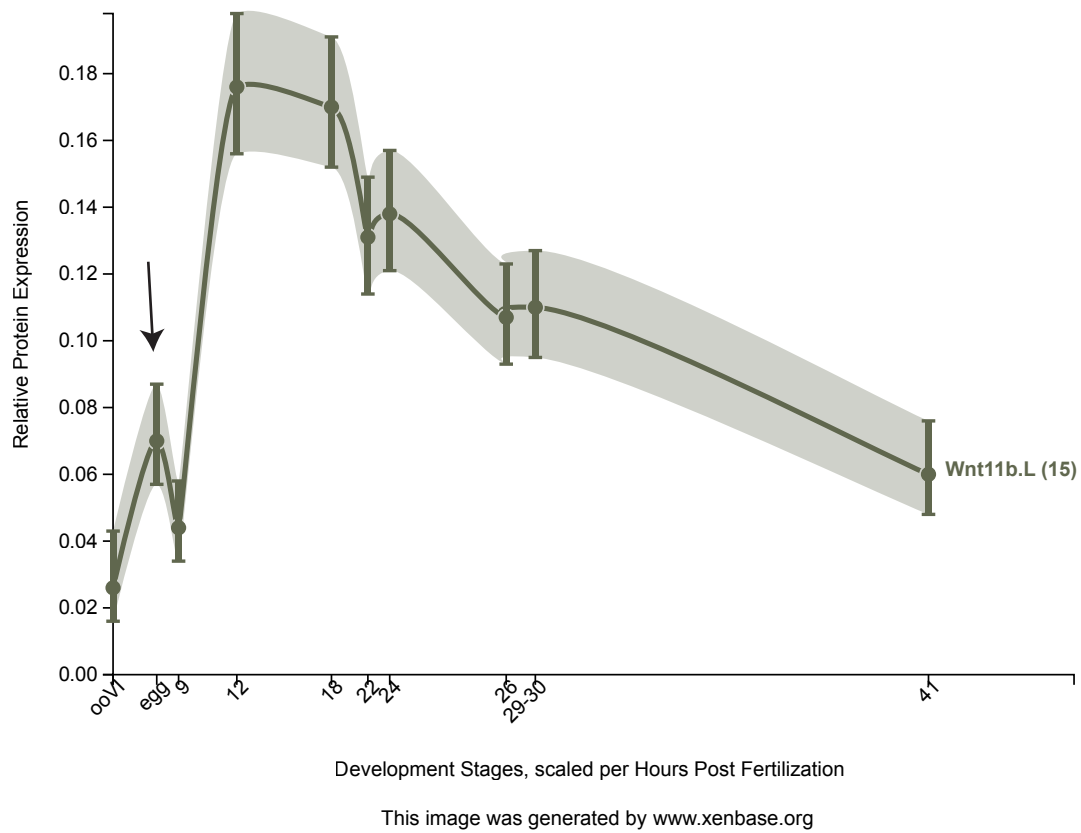

**Fig. S10.** Relative protein expression of Wnt11b protein during *Xenopus laevis* development. Data were visualized on xenbase.org and were derived from Peshkin et al. (2019). Nieuwkoop and Faber stages are shown on the x-axis, scaled to represent hours post-fertilization. The arrow indicates an increase in relative Wnt11b protein level in the fertilized egg. A larger increase is apparent during gastrulation.

**Table S1. Primers and Oligos****wnt11b.L CRISPR Guide RNAs**

| Name              | CRISPRscan Score* Position             | Exon | Length (bp) | Target Sequence (PAM)     |
|-------------------|----------------------------------------|------|-------------|---------------------------|
| GG18NGG-72 (sgT1) | 72 chr8L:21220561..21220583 (+ strand) | 1    | 23          | GGATCTGTGGCCCATCCAG(TGG)  |
| GG18NGG-44 (sgT2) | 44 chr8L:21221317..21221339 (+ strand) | 2    | 23          | GGCTCACCGTAAATGGCAGC(CGG) |

from: [http://www.xenbase.org/common/displayJBrowse.do?data=data/xl9\\_2&loc=chr8L:21220220..21226166&tracks=XL9\\_2\\_Xenbase](http://www.xenbase.org/common/displayJBrowse.do?data=data/xl9_2&loc=chr8L:21220220..21226166&tracks=XL9_2_Xenbase)  
 \*(Moreno-Mateos et al., 2015)

| Oligo Sequence          |                                                                           |
|-------------------------|---------------------------------------------------------------------------|
| GG18NGG-72 (sgT1)       | taatacgactcactataGGATCTGTGGCCCATCCAGgttttagagctagaa                       |
| GG18NGG-44 (sgT2)       | taatacgactcactataGGCTCACCGTAAATGGCAGCgttttagagctagaa                      |
| Universal Reverse Oligo | aaaagcaccgactcgtgccacttttcaagtgataacgactagccttatttaactgctatttctagctctaaac |

**wnt11b.L Genotyping Primers**

| Sequence                 | Amplicon | Notes                          |
|--------------------------|----------|--------------------------------|
| F: AAGCCACTGACTTGACCGC   | -----    | N/A                            |
| R: GCAGCTCTCATTGTGGTTTAG | 703 bp   | use for PCR product sequencing |

**wnt11b.L CDS Primers**

| Sequence              | Amplicon | Notes         |
|-----------------------|----------|---------------|
| F: ATGGCTCCGACCCGTCAC | -----    | N/A           |
| R: CTTGCAGACATACCTCTC | 1041 bp  | no stop codon |

**RT-PCR Primers**

| Name        | Detection | Forward                      | Reverse                       | Reference                 |
|-------------|-----------|------------------------------|-------------------------------|---------------------------|
| odc1.L/S    | UPL #69   | F: CAGCTTCAGCAATGACGACT      | R: AGATCAGCAACATAAAAGGCATC    | Schneider et al., 2010    |
| fgfr1.L/S   | UPL #89   | F: TCGGACAAGGATATGGAGGT      | R: AATGGAGTTAGCGGCCAAG        | prev. unpublished         |
| wnt11b.L    | UPL #16   | F: CAGGATCTTCCCATATTGC       | R: CAGGATCTTCCCATATTGC        | prev. unpublished         |
| wnt11.L/S   | UPL #94   | F: CGAATAAGCTCATGCACCTG      | R: GAGACGCCATGACACTTGC        | prev. unpublished         |
| odc.L/S     | SYBR      | F: CATGCACATGTCAAGCCAGT      | R: CAGGGAGAATGCCATGTTCT       | prev. unpublished         |
| fgfr1.L/S   | SYBR      | F: TCGCCCCTAAAACCAAAACG      | R: TGTTCATCATCATCGTCGTCC      | Monsoro-Burq et al., 2003 |
| myod1.L/S   | SYBR      | F: AGCTCCAAGTCTCCGACGGCATGAA | R: AGGAGAGAATCCAGTTGATGGAAACA | Rupp and Weintraub, 1991  |
| sizzled.L/S | SYBR      | F: GTCTTCTGCTCTCTCTG         | R: AACAGGGAGGACAGGAAG         | prev. unpublished         |
| sia1.L/S    | SYBR      | F: GAGCCCAGGATACAGGTTTG      | R: CAGTTTGGGTAGGGCTGTGT       | prev. unpublished         |
| nodal3.1.L  | SYBR      | F: TAATCTGTTGTCCGATCCA       | R: ATCAATGTTGCCCTTTTCA        | Kofron et al., 2004       |

\*\* primers and oligos are shown in 5' -> 3' orientation  
 UPL = Universal Probe Library hydrolysis probes

**Table S2. Summary of microtubule defects in *wnt11b.L* mutant eggs****Series 1**

| <i>female x male geno.</i>           | <i>Normal (1)</i> | <i>Reduced/Disorg. (2)</i> | <i>Severely reduced (3)</i> | <i>n</i> |
|--------------------------------------|-------------------|----------------------------|-----------------------------|----------|
| <i>60 minutes post-fertilization</i> |                   |                            |                             |          |
| -/- x -/-                            | 0                 | 8                          | 4                           | 12       |
| -/- x +/+                            | 0                 | 6                          | 6                           | 12       |
| +/+ x -/-                            | 12                | 0                          | 0                           | 12       |
| +/+ x +/+                            | 10                | 1                          | 0                           | 11       |
| <i>80 minutes post-fertilization</i> |                   |                            |                             |          |
| -/- x -/-                            | 0                 | 2                          | 10                          | 12       |
| -/- x +/+                            | 0                 | 5                          | 7                           | 12       |
| +/+ x -/-                            | 11                | 1                          | 0                           | 12       |
| +/+ x +/+                            | 8                 | 2                          | 0                           | 10       |

**Series 2**

|                                | <i>Normal (1)</i> | <i>Reduced/Disorg. (2)</i> | <i>Severely reduced (3)</i> | <i>n</i> |
|--------------------------------|-------------------|----------------------------|-----------------------------|----------|
| -/- 70'; post-prick activation | 7                 | 12                         | 1                           | 20       |
| +/+ 70' post-prick activation  | 18                | 2                          | 0                           | 20       |

**Table S3. Summary of microtubule dynamic parameters in *wnt11b.L* mutant oocytes and eggs**

| <b>Oocytes (n=8 each)</b>        | <i>wildtype_oocyte</i> | <i>mutant_oocyte</i> | <i>adj_p</i> | <i>sig (adj_p&lt;0.01)</i> |                      |                    |
|----------------------------------|------------------------|----------------------|--------------|----------------------------|----------------------|--------------------|
| nGrowths                         | 1716.88 ± 507.16       | 2207.75 ± 1327.80    | 0.3452       | FALSE                      |                      |                    |
| growth_speed_mean (µm/min)       | 6.96 ± 0.417           | 7.65 ± 0.38          | 0.0185       | FALSE                      |                      |                    |
| growth_lifetime_mean (sec)       | 5.68 ± 0.22            | 5.43 ± 0.53          | 0.2943       | FALSE                      |                      |                    |
| growth_length_mean (µm)          | 0.64 ± 0.051           | 0.69 ± 0.05          | 0.2533       | FALSE                      |                      |                    |
| Rvalue                           | 0.027 ± 0.019          | 0.041 ± 0.02         | 0.2943       | FALSE                      |                      |                    |
| <b>Eggs (n=8 each)</b>           | <i>wildtype_egg</i>    | <i>mutant_egg</i>    | <i>adj_p</i> | <i>sig (adj_p&lt;0.01)</i> |                      |                    |
| nGrowths                         | 1196.57 ± 384.14       | 1064.75 ± 345.60     | 0.6204       | FALSE                      |                      |                    |
| growth_speed_mean (µm/min)       | 6.52 ± 0.47            | 7.29 ± 0.67          | 0.0632       | FALSE                      |                      |                    |
| growth_lifetime_mean (sec)       | 6.69 ± 0.29            | 6.20 ± 0.25          | 0.0175       | FALSE                      |                      |                    |
| growth_length_mean (µm)          | 0.68 ± 0.05            | 0.72 ± 0.05          | 0.2813       | FALSE                      |                      |                    |
| Rvalue                           | 0.06 ± 0.04            | 0.05 ± 0.05          | 0.6703       | FALSE                      |                      |                    |
| <b>Activated eggs (n=12, 14)</b> | <i>wildtype_60min</i>  | <i>mutant_60min</i>  | <i>adj_p</i> | <i>sig (adj_p&lt;0.01)</i> | <i>cvar_wildtype</i> | <i>cvar_mutant</i> |
| nGrowths                         | 5197 ± 1159.96         | 3728.93 ± 1378.33    | 0.0310       | FALSE                      | 0.2232               | 0.3427             |
| growth_speed_mean (µm/min)       | 8.25 ± 0.46            | 7.90 ± 0.77          | 0.5158       | FALSE                      | 0.0558               | 0.0975             |
| growth_lifetime_mean (sec)       | 6.86 ± 0.42            | 6.39 ± 0.58          | 0.0879       | FALSE                      | 0.0612               | 0.0906             |
| growth_length_mean (µm)          | 0.94 ± 0.07            | 0.81 ± 0.07          | 0.0015       | <b>TRUE</b>                | 0.0745               | 0.0864             |
| Rvalue                           | 0.29 ± 0.07            | 0.16 ± 0.08          | 0.0028       | <b>TRUE</b>                | 0.2414               | 0.5000             |

cvar= coefficient of variation

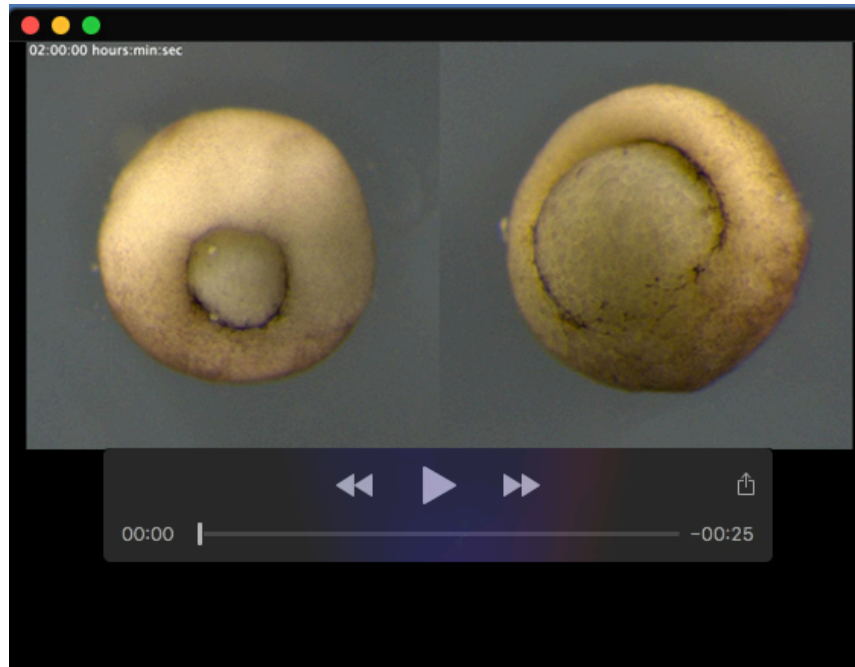

**Movie 1. Gastrulation delay in *wnt11b* mutants.** Representative time lapse movies of control heterozygous embryos (left) or *wnt11b*<sup>-/-</sup> mutant embryos (right). Embryos were imaged beginning around stage 10.5 and frames were captured every 10 minutes for nine hours. The time is displayed in the upper left; hr:min:sec. Related to Fig. 1E.

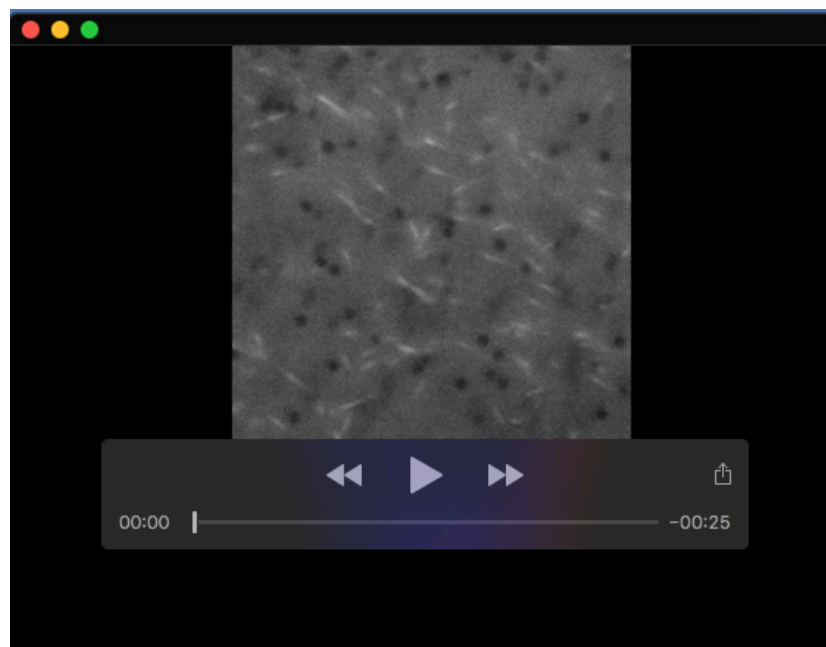

**Movie 2.** Representative time-lapse imaging of a prick-activated wildtype control egg injected with *eb3-gfp* mRNA (500 pg). Frames were captured at two-second intervals over two minutes. This movie represents normal cortical rotation; related to Fig. 7.

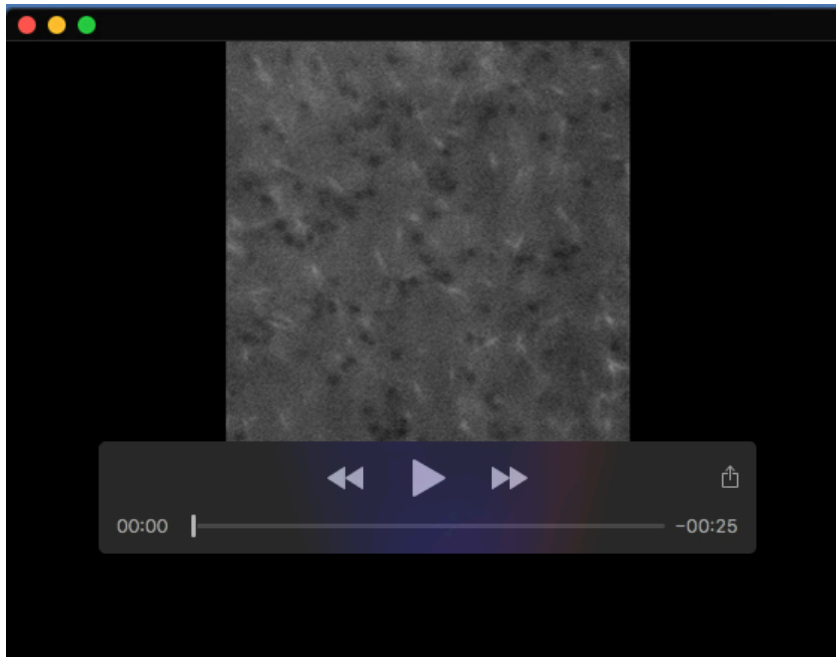

**Movie 3.** Representative time-lapse imaging of a prick-activated *wnt11b* *-/-* mutant egg injected with *eb3-gfp* mRNA (500 pg). Frames were captured at two-second intervals over two minutes. This movie represents reduced but directional cortical rotation; related to Fig. 7.

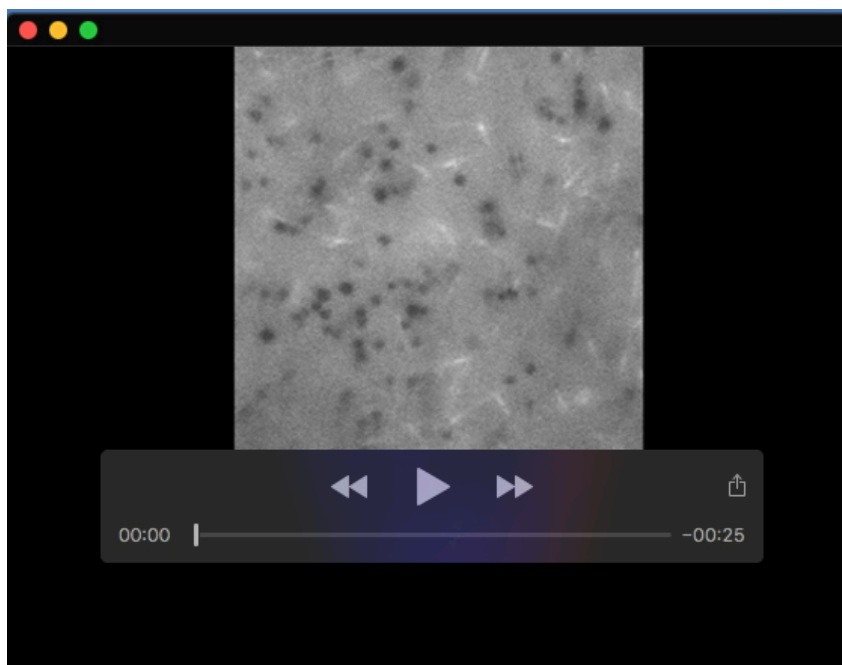

**Movie 4.** Representative time-lapse imaging of a prick-activated *wnt11b* *-/-* mutant egg injected with *eb3-gfp* mRNA (500 pg). Frames were captured at two-second intervals over two minutes. This movie represents reduced but poorly directional cortical rotation; related to Fig. S8.
